# Supplementary material for: Severe Acute Respiratory Syndrome Coronavirus 2 Variants of Concern: A Perspective for Emerging More Transmissible and Vaccine-Resistant Strains
Source: MDPI journal article supplement (doi:10.3390/v14040827), 2022-04-16
Supplement: s1 [file s1]

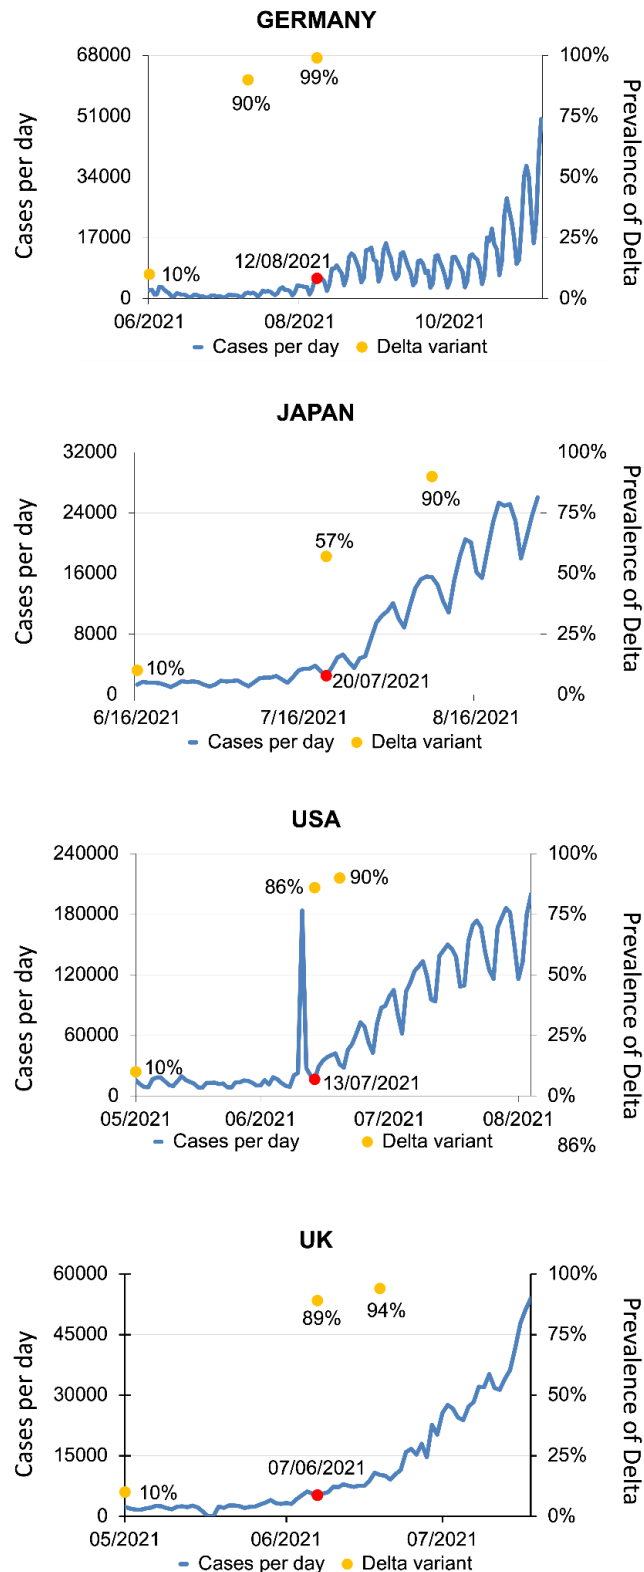

**Figure S1. Number of COVID-19 cases and the prevalence of the SARS-CoV-2 Delta variant in the UK, Japan, USA, and Germany.** Graphs of the number of cases (blue line) and the percentage of the Delta variant (orange circles) as a function of time. Red circles show the beginning of a new COVID-19 peak case. All data were obtained from World in Data, WHO, CDC, UK Gov and Outbreak [1,148–151].

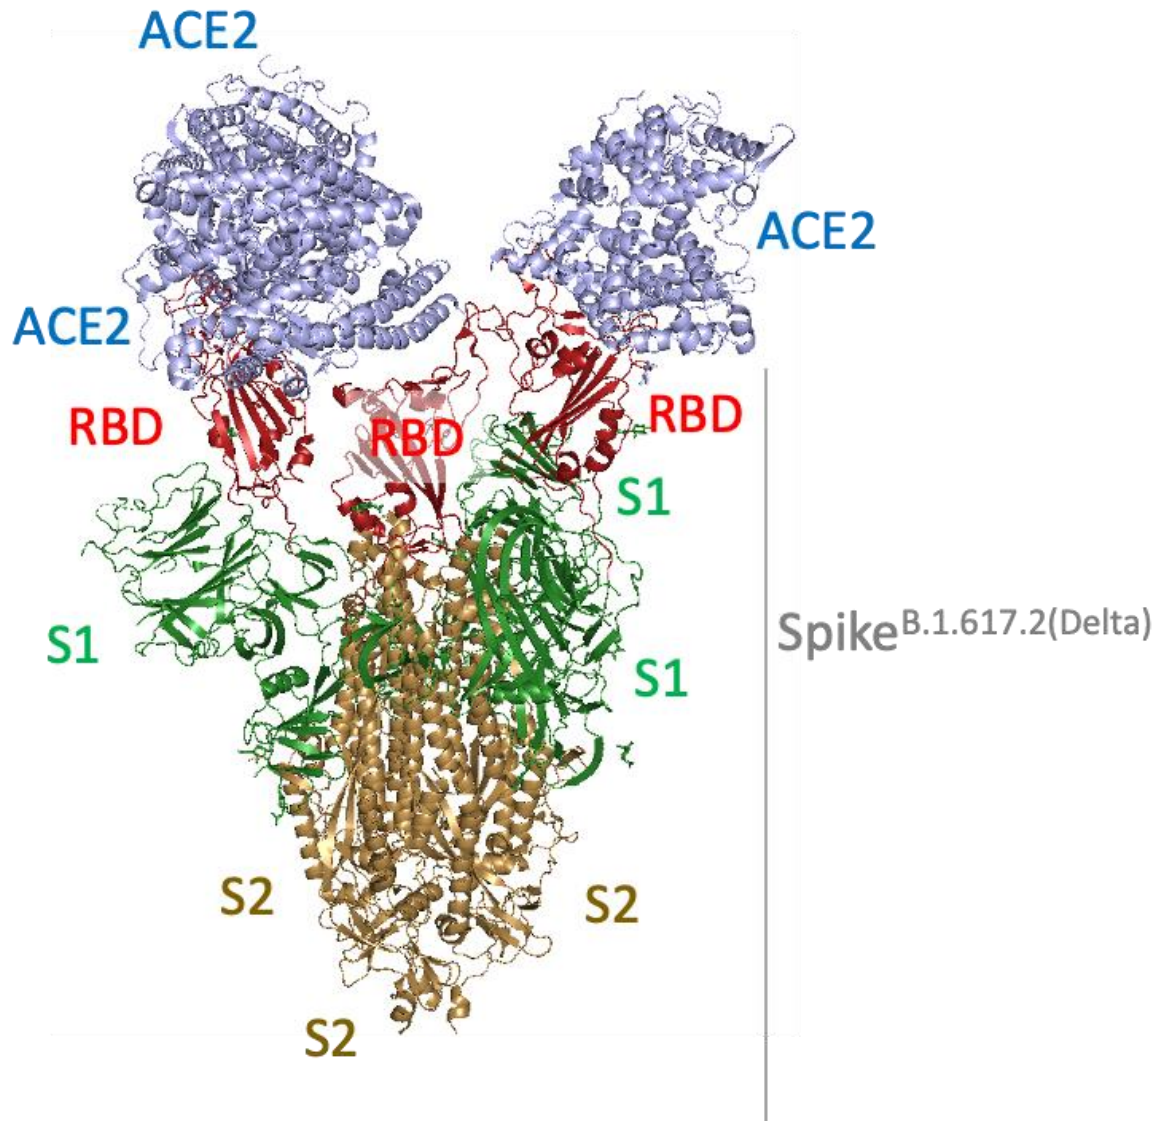

**Figure S2. Cryo-EM structure of SARS-CoV-2 Spike<sup>B.1.617.2(Delta)</sup> in complex with Angiotensin-converting enzyme 2 (ACE2) ectodomain.** ACE2 is colored in blue, Spike protein structure in red (RBD domain), green (S1 subunit not considering the RBD domain) and brown (S2 domain) (protein data bank, PDB, 7V8A, not published).

A

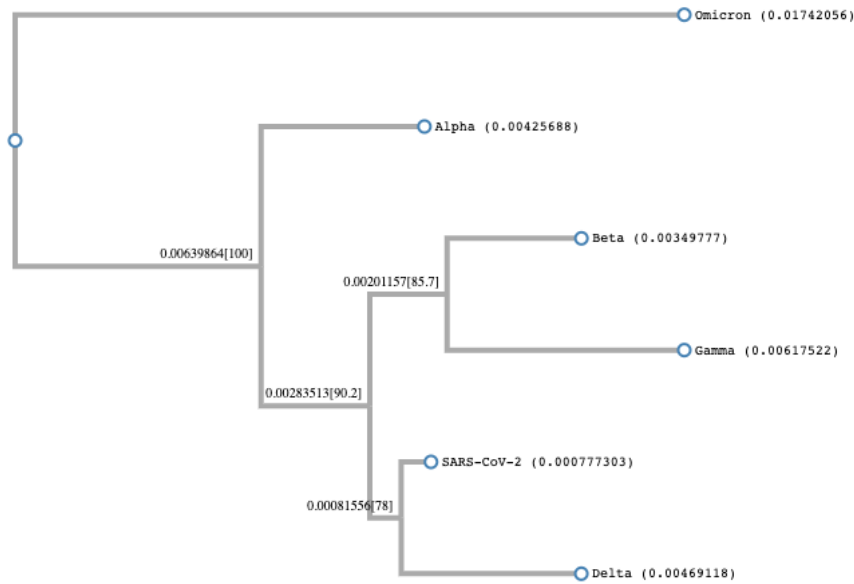

B

|                   |                                                              |     |
|-------------------|--------------------------------------------------------------|-----|
| SARS-CoV-2        | MFVFLVLLPLVSSQCVNLTTRTQLPPAYTNSFTRGVYYPDKVFRSSVLHSTQDLFLPFFS | 60  |
| Delta/B.1.617.2   | MFVFLVLLPLVSSQCVNLTTRTQLPPAYTNSFTRGVYYPDKVFRSSVLHSTQDLFLPFFS | 60  |
| Omicron/B.1.1.529 | MFVFLVLLPLVSSQCVNLTTRTQLPPAYTNSFTRGVYYPDKVFRSSVLHSTQDLFLPFFS | 60  |
| Alpha/B.1.1.7     | MFVFLVLLPLVSSQCVNLTTRTQLPPAYTNSFTRGVYYPDKVFRSSVLHSTQDLFLPFFS | 60  |
| P.1/Gamma         | MFVFLVLLPLVSSQCVNLTTRTQLPPAYTNSFTRGVYYPDKVFRSSVLHSTQDLFLPFFS | 60  |
| Beta/B.1.351      | MFVFLVLLPLVSSQCVNLTTRTQLPPAYTNSFTRGVYYPDKVFRSSVLHSTQDLFLPFFS | 60  |
|                   | *****: .*****                                                |     |
| SARS-CoV-2        | NVTWFHAIHVSGTNGTKRFDNPVLPFNDGVYFASTEKSNIIRGWIFGTTLDSTQSLIV   | 120 |
| Delta/B.1.617.2   | NVTWFHAIHVSGTNGTKRFDNPVLPFNDGVYFASTEKSNIIRGWIFGTTLDSTQSLIV   | 120 |
| Omicron/B.1.1.529 | NVTWFHVI--SGTNGTKRFDNPVLPFNDGVYFASTEKSNIIRGWIFGTTLDSTQSLIV   | 118 |
| Alpha/B.1.1.7     | NVTWFHAI--SGTNGTKRFDNPVLPFNDGVYFASTEKSNIIRGWIFGTTLDSTQSLIV   | 118 |
| P.1/Gamma         | NVTWFHAIHVSGTNGTKRFDNPVLPFNDGVYFASTEKSNIIRGWIFGTTLDSTQSLIV   | 120 |
| Beta/B.1.351      | NVTWFHAIHVSGTNGTKRFDNPVLPFNDGVYFASTEKSNIIRGWIFGTTLDSTQSLIV   | 120 |
|                   | *****.* *****                                                |     |
| SARS-CoV-2        | NNATNVVIKVCEFCNDPFLGVYHKNKSWMESEFRVYSSANNCTFEYVSQPFLLMDLE    | 180 |
| Delta/B.1.617.2   | NNATNVVIKVCEFCNDPFLDVYHKNKSWMESG--VYSSANNCTFEYVSQPFLLMDLE    | 180 |
| Omicron/B.1.1.529 | NNATNVVIKVCEFCNDPFLD---HKNNKSWMESEFRVYSSANNCTFEYVSQPFLLMDLE  | 175 |
| Alpha/B.1.1.7     | NNATNVVIKVCEFCNDPFLGVY-HKNNKSWMESEFRVYSSANNCTFEYVSQPFLLMDLE  | 177 |
| P.1/Gamma         | NNATNVVIKVCEFCNYPFLGVYHKNKSWMESEFRVYSSANNCTFEYVSQPFLLMDLE    | 180 |
| Beta/B.1.351      | NNATNVVIKVCEFCNDPFLGVYHKNKSWMESEFRVYSSANNCTFEYVSQPFLLMDLE    | 180 |
|                   | ***** **.                                                    |     |
| SARS-CoV-2        | GKQGNFKNLREFVFNIDGYFKIYKHTPINL--VRDLPQGFSALEPLVDLPIGINITRF   | 238 |
| Delta/B.1.617.2   | GKQGNFKNLREFVFNIDGYFKIYKHTPINL--VRDLPQGFSALEPLVDLPIGINITRF   | 238 |
| Omicron/B.1.1.529 | GKQGNFKNLREFVFNIDGYFKIYKHTPIIVREPEDLPQGFSALEPLVDLPIGINITRF   | 235 |
| Alpha/B.1.1.7     | GKQGNFKNLREFVFNIDGYFKIYKHTPINL--VRDLPQGFSALEPLVDLPIGINITRF   | 235 |
| P.1/Gamma         | GKQGNFKNLSEFVFNIDGYFKIYKHTPINL--VRDLPQGFSALEPLVDLPIGINITRF   | 238 |
| Beta/B.1.351      | GKQGNFKNLREFVFNIDGYFKIYKHTPINL--VRGLPQGFSALEPLVDLPIGINITRF   | 238 |
|                   | ***** *****: ..*****                                         |     |

|                   |                                        |                           |     |
|-------------------|----------------------------------------|---------------------------|-----|
| SARS-CoV-2        | QTLLALHRSYLT<br>PGDSSSGWTAGAAAYVGYLQPR | TFLLYKNENGTITDAVDCALDPLSE | 298 |
| Delta/B.1.617.2   | QTLLALHRSYLT<br>PGDSSSGWTAGAAAYVGYLQPR | TFLLYKNENGTITDAVDCALDPLSE | 298 |
| Omicron/B.1.1.529 | QTLLALHRSYLT<br>PGDSSSGWTAGAAAYVGYLQPR | TFLLYKNENGTITDAVDCALDPLSE | 295 |
| Alpha/B.1.1.7     | QTLLALHRSYLT<br>PGDSSSGWTAGAAAYVGYLQPR | TFLLYKNENGTITDAVDCALDPLSE | 295 |
| P.1/Gamma         | QTLLALHRSYLT<br>PGDSSSGWTAGAAAYVGYLQPR | TFLLYKNENGTITDAVDCALDPLSE | 298 |
| Beta/B.1.351      | QT---LHRSYLT<br>PGDSSSGWTAGAAAYVGYLQPR | TFLLYKNENGTITDAVDCALDPLSE | 295 |
| ** *****          |                                        |                           |     |

|                   |                                    |                            |     |
|-------------------|------------------------------------|----------------------------|-----|
| SARS-CoV-2        | TKCTLKSFTVEKGIYQTSNFRVQPTESIVRFPNI | TNLCPFGEVFNATRFASVYAWNRRKI | 358 |
| Delta/B.1.617.2   | TKCTLKSFTVEKGIYQTSNFRVQPTESIVRFPNI | TNLCPFGEVFNATRFASVYAWNRRKI | 358 |
| Omicron/B.1.1.529 | TKCTLKSFTVEKGIYQTSNFRVQPTESIVRFPNI | TNLCPFGEVFNATRFASVYAWNRRKI | 355 |
| Alpha/B.1.1.7     | TKCTLKSFTVEKGIYQTSNFRVQPTESIVRFPNI | TNLCPFGEVFNATRFASVYAWNRRKI | 355 |
| P.1/Gamma         | TKCTLKSFTVEKGIYQTSNFRVQPTESIVRFPNI | TNLCPFGEVFNATRFASVYAWNRRKI | 358 |
| Beta/B.1.351      | TKCTLKSFTVEKGIYQTSNFRVQPTESIVRFPNI | TNLCPFGEVFNATRFASVYAWNRRKI | 355 |
| ***** . *****     |                                    |                            |     |

|                   |                            |                         |     |
|-------------------|----------------------------|-------------------------|-----|
| SARS-CoV-2        | SNCVADYSVLYNSASFSTFKCYGVSP | TKLNDLCFTNVYADSFVIRGDEV | 418 |
| Delta/B.1.617.2   | SNCVADYSVLYNSASFSTFKCYGVSP | TKLNDLCFTNVYADSFVIRGDEV | 418 |
| Omicron/B.1.1.529 | SNCVADYSVLYNSAPFFTFKCYGVSP | TKLNDLCFTNVYADSFVIRGDEV | 415 |
| Alpha/B.1.1.7     | SNCVADYSVLYNSASFSTFKCYGVSP | TKLNDLCFTNVYADSFVIRGDEV | 415 |
| P.1/Gamma         | SNCVADYSVLYNSASFSTFKCYGVSP | TKLNDLCFTNVYADSFVIRGDEV | 418 |
| Beta/B.1.351      | SNCVADYSVLYNSASFSTFKCYGVSP | TKLNDLCFTNVYADSFVIRGDEV | 415 |
| ***** * *****     |                            |                         |     |

|                     |                             |                         |     |
|---------------------|-----------------------------|-------------------------|-----|
| SARS-CoV-2          | ADYNYKLDDFTGCVIAWNSNNLDSKVG | SNLYLYLFRKSNLKPFERDISTE | 478 |
| Delta/B.1.617.2     | ADYNYKLDDFTGCVIAWNSNNLDSKVG | SNLYLYLFRKSNLKPFERDISTE | 478 |
| Omicron/B.1.1.529   | ADYNYKLDDFTGCVIAWNSNNLDSKVG | SNLYLYLFRKSNLKPFERDISTE | 475 |
| Alpha/B.1.1.7       | ADYNYKLDDFTGCVIAWNSNNLDSKVG | SNLYLYLFRKSNLKPFERDISTE | 475 |
| P.1/Gamma           | ADYNYKLDDFTGCVIAWNSNNLDSKVG | SNLYLYLFRKSNLKPFERDISTE | 478 |
| Beta/B.1.351        | ADYNYKLDDFTGCVIAWNSNNLDSKVG | SNLYLYLFRKSNLKPFERDISTE | 475 |
| ***** : ***** ***** |                             |                         |     |

↓

|                                 |                        |                                       |     |
|---------------------------------|------------------------|---------------------------------------|-----|
| SARS-CoV-2                      | PCNGVEGFNCYFPLQSYGFQPT | YGVGYQPYRVVLSFELLHAPATVCGPKKSTNLVKNKC | 538 |
| Delta/B.1.617.2                 | PCNGVEGFNCYFPLQSYGFQPT | YGVGYQPYRVVLSFELLHAPATVCGPKKSTNLVKNKC | 538 |
| Omicron/B.1.1.529               | PCNGVAGFNCYFPLRSYSFRPT | YGVGHQPYRVVLSFELLHAPATVCGPKKSTNLVKNKC | 535 |
| Alpha/B.1.1.7                   | PCNGVEGFNCYFPLQSYGFQPT | YGVGYQPYRVVLSFELLHAPATVCGPKKSTNLVKNKC | 535 |
| P.1/Gamma                       | PCNGVKGfNCYFPLQSYGFQPT | YGVGYQPYRVVLSFELLHAPATVCGPKKSTNLVKNKC | 538 |
| Beta/B.1.351                    | PCNGVKGfNCYFPLQSYGFQPT | YGVGYQPYRVVLSFELLHAPATVCGPKKSTNLVKNKC | 535 |
| ***** ***** : * : * * * : ***** |                        |                                       |     |

|                     |                           |                                   |     |
|---------------------|---------------------------|-----------------------------------|-----|
| SARS-CoV-2          | VNFNFNGLTGTGVLTESNKKFLPFQ | QFGRDIADTTDAVRDPQTLEILDITPCSFGGVS | 598 |
| Delta/B.1.617.2     | VNFNFNGLTGTGVLTESNKKFLPFQ | QFGRDIADTTDAVRDPQTLEILDITPCSFGGVS | 598 |
| Omicron/B.1.1.529   | VNFNFNGLTGTGVLTESNKKFLPFQ | QFGRDIADTTDAVRDPQTLEILDITPCSFGGVS | 595 |
| Alpha/B.1.1.7       | VNFNFNGLTGTGVLTESNKKFLPFQ | QFGRDIADTTDAVRDPQTLEILDITPCSFGGVS | 595 |
| P.1/Gamma           | VNFNFNGLTGTGVLTESNKKFLPFQ | QFGRDIADTTDAVRDPQTLEILDITPCSFGGVS | 598 |
| Beta/B.1.351        | VNFNFNGLTGTGVLTESNKKFLPFQ | QFGRDIADTTDAVRDPQTLEILDITPCSFGGVS | 595 |
| ***** . ***** ***** |                           |                                   |     |

↓

|                    |                          |                                      |     |
|--------------------|--------------------------|--------------------------------------|-----|
| SARS-CoV-2         | TPGTNTSNQVAVLYQGVNCTEVPV | AIHADQLTPTWRVYSTGSNVFQTRAGCLIGAEHVNN | 658 |
| Delta/B.1.617.2    | TPGTNTSNQVAVLYQGVNCTEVPV | AIHADQLTPTWRVYSTGSNVFQTRAGCLIGAEHVNN | 658 |
| Omicron/B.1.1.529  | TPGTNTSNQVAVLYQGVNCTEVPV | AIHADQLTPTWRVYSTGSNVFQTRAGCLIGAEYVNN | 655 |
| Alpha/B.1.1.7      | TPGTNTSNQVAVLYQGVNCTEVPV | AIHADQLTPTWRVYSTGSNVFQTRAGCLIGAEHVNN | 655 |
| P.1/Gamma          | TPGTNTSNQVAVLYQGVNCTEVPV | AIHADQLTPTWRVYSTGSNVFQTRAGCLIGAEYVNN | 658 |
| Beta/B.1.351       | TPGTNTSNQVAVLYQGVNCTEVPV | AIHADQLTPTWRVYSTGSNVFQTRAGCLIGAEHVNN | 655 |
| ***** . ***** : ** |                          |                                      |     |

S1/S2

▽

|                   |                             |                            |     |
|-------------------|-----------------------------|----------------------------|-----|
| SARS-CoV-2        | SYECDIPIGAGICASYQTQNSPRRAR  | SVASQSI IAYTMSLGAENSVAYSNN | 718 |
| Delta/B.1.617.2   | SYECDIPIGAGICASYQTQNSRRRAR  | SVASQSI IAYTMSLGAENSVAYSNN | 718 |
| Omicron/B.1.1.529 | SYECDIPIGAGICASYQTQTKSHRRAR | SVASQSI IAYTMSLGAENSVAYSNN | 715 |
| Alpha/B.1.1.7     | SYECDIPIGAGICASYQTQNSHRRAR  | SVASQSI IAYTMSLGAENSVAYSNN | 715 |
| P.1/Gamma         | SYECDIPIGAGICASYQTQNSPRRAR  | SVASQSI IAYTMSLGAENSVAYSNN | 718 |
| Beta/B.1.351      | SYECDIPIGAGICASYQTQNSPRRAR  | SVASQSI IAYTMSLGVENSVAYSNN | 715 |

|                   |                                                                       |      |
|-------------------|-----------------------------------------------------------------------|------|
|                   | *****:.* *****.***** **                                               |      |
| SARS-CoV-2        | <b>TISVTTEILPVSMTKTSVDCTMYICGDSTEC SNLLQYGSFCTQLNRALTGIAVEQDKNT</b>   | 778  |
| Delta/B.1.617.2   | TISVTTEILPVSMTKTSVDCTMYICGDSTEC SNLLQYGSFCTQLNRALTGIAVEQDKNT          | 778  |
| Omicron/B.1.1.529 | TISVTTEILPVSMTKTSVDCTMYICGDSTEC SNLLQYGSFCTQLNRALTGIAVEQDKNT          | 775  |
| Alpha/B.1.1.7     | TISVTTEILPVSMTKTSVDCTMYICGDSTEC SNLLQYGSFCTQLNRALTGIAVEQDKNT          | 775  |
| P.1/Gamma         | TISVTTEILPVSMTKTSVDCTMYICGDSTEC SNLLQYGSFCTQLNRALTGIAVEQDKNT          | 778  |
| Beta/B.1.351      | TISVTTEILPVSMTKTSVDCTMYICGDSTEC SNLLQYGSFCTQLNRALTGIAVEQDKNT          | 775  |
|                   | *****:*****                                                           |      |
|                   | <b>S2'</b>                                                            |      |
|                   | ▽                                                                     |      |
| SARS-CoV-2        | <b>QEVFAQVKQIYKTPPIKDFGGFNFSQILPDPSKPSKRSFIEDLLFNKVTLDAGFIKQYG</b>    | 838  |
| Delta/B.1.617.2   | QEVFAQVKQIYKTPPIKDFGGFNFSQILPDPSKPSKRSFIEDLLFNKVTLDAGFIKQYG           | 838  |
| Omicron/B.1.1.529 | QEVFAQVKQIYKTPPIKDFGGFNFSQILPDPSKPSKRSFIEDLLFNKVTLDAGFIKQYG           | 835  |
| Alpha/B.1.1.7     | QEVFAQVKQIYKTPPIKDFGGFNFSQILPDPSKPSKRSFIEDLLFNKVTLDAGFIKQYG           | 835  |
| P.1/Gamma         | QEVFAQVKQIYKTPPIKDFGGFNFSQILPDPSKPSKRSFIEDLLFNKVTLDAGFIKQYG           | 838  |
| Beta/B.1.351      | QEVFAQVKQIYKTPPIKDFGGFNFSQILPDPSKPSKRSFIEDLLFNKVTLDAGFIKQYG           | 835  |
|                   | ***** *****                                                           |      |
| SARS-CoV-2        | <b>DCLGDIAARDLICAQKFNGLTVLPPLLTDEMIAQYTSALLAGTITSGWTFGAGAALQIPF</b>   | 898  |
| Delta/B.1.617.2   | DCLGDIAARDLICAQKFNGLTVLPPLLTDEMIAQYTSALLAGTITSGWTFGAGAALQIPF          | 898  |
| Omicron/B.1.1.529 | DCLGDIAARDLICAQKFNGLTVLPPLLTDEMIAQYTSALLAGTITSGWTFGAGAALQIPF          | 895  |
| Alpha/B.1.1.7     | DCLGDIAARDLICAQKFNGLTVLPPLLTDEMIAQYTSALLAGTITSGWTFGAGAALQIPF          | 895  |
| P.1/Gamma         | DCLGDIAARDLICAQKFNGLTVLPPLLTDEMIAQYTSALLAGTITSGWTFGAGAALQIPF          | 898  |
| Beta/B.1.351      | DCLGDIAARDLICAQKFNGLTVLPPLLTDEMIAQYTSALLAGTITSGWTFGAGAALQIPF          | 895  |
|                   | *****:*****                                                           |      |
| SARS-CoV-2        | <b>AMQMAYRFNGIGVTONVLYENQKLIANQFN SAIGKIQDSLSTASALGKLQDVVNQNAQA</b>   | 958  |
| Delta/B.1.617.2   | AMQMAYRFNGIGVTONVLYENQKLIANQFN SAIGKIQDSLSTASALGKLQDVVNQNAQA          | 958  |
| Omicron/B.1.1.529 | AMQMAYRFNGIGVTONVLYENQKLIANQFN SAIGKIQDSLSTASALGKLQDVVNQNAQA          | 955  |
| Alpha/B.1.1.7     | AMQMAYRFNGIGVTONVLYENQKLIANQFN SAIGKIQDSLSTASALGKLQDVVNQNAQA          | 955  |
| P.1/Gamma         | AMQMAYRFNGIGVTONVLYENQKLIANQFN SAIGKIQDSLSTASALGKLQDVVNQNAQA          | 958  |
| Beta/B.1.351      | AMQMAYRFNGIGVTONVLYENQKLIANQFN SAIGKIQDSLSTASALGKLQDVVNQNAQA          | 955  |
|                   | *****:***:***                                                         |      |
| SARS-CoV-2        | <b>LNTLVKQLSSNFGAISSVLNDILSR LDKVEAEVQIDRLITGRLQSLQTYVTQQLIRAAEI</b>  | 1018 |
| Delta/B.1.617.2   | LNTLVKQLSSNFGAISSVLNDILSR LDKVEAEVQIDRLITGRLQSLQTYVTQQLIRAAEI         | 1018 |
| Omicron/B.1.1.529 | LNTLVKQLSSKFGAISSVLNDIFSR LDKVEAEVQIDRLITGRLQSLQTYVTQQLIRAAEI         | 1015 |
| Alpha/B.1.1.7     | LNTLVKQLSSNFGAISSVLNDILAR LDKVEAEVQIDRLITGRLQSLQTYVTQQLIRAAEI         | 1015 |
| P.1/Gamma         | LNTLVKQLSSNFGAISSVLNDILSR LDKVEAEVQIDRLITGRLQSLQTYVTQQLIRAAEI         | 1018 |
| Beta/B.1.351      | LNTLVKQLSSNFGAISSVLNDILSR LDKVEAEVQIDRLITGRLQSLQTYVTQQLIRAAEI         | 1015 |
|                   | *****:*****:*****                                                     |      |
| SARS-CoV-2        | <b>RASANLAATKMSECVLGQSKRVDFCGKG YHLSFPQSAPHGVVFLHVTVYPAQEKNFTTA</b>   | 1078 |
| Delta/B.1.617.2   | RASANLAATKMSECVLGQSKRVDFCGKG YHLSFPQSAPHGVVFLHVTVYPAQEKNFTTA          | 1078 |
| Omicron/B.1.1.529 | RASANLAATKMSECVLGQSKRVDFCGKG YHLSFPQSAPHGVVFLHVTVYPAQEKNFTTA          | 1075 |
| Alpha/B.1.1.7     | RASANLAATKMSECVLGQSKRVDFCGKG YHLSFPQSAPHGVVFLHVTVYPAQEKNFTTA          | 1075 |
| P.1/Gamma         | RASANLAATKMSECVLGQSKRVDFCGKG YHLSFPQSAPHGVVFLHVTVYPAQEKNFTTA          | 1078 |
| Beta/B.1.351      | RASANLAATKMSECVLGQSKRVDFCGKG YHLSFPQSAPHGVVFLHVTVYPAQEKNFTTA          | 1075 |
|                   | ***** *****                                                           |      |
| SARS-CoV-2        | <b>PAICHDGKAHFPREGV FVSN GTHWFVTQRNFYEPQIITTDNTFVSGNCDVVIGIVNNTVY</b> | 1138 |
| Delta/B.1.617.2   | PAICHDGKAHFPREGV FVSN GTHWFVTQRNFYEPQIITTDNTFVSGNCDVVIGIVNNTVY        | 1138 |
| Omicron/B.1.1.529 | PAICHDGKAHFPREGV FVSN GTHWFVTQRNFYEPQIITTDNTFVSGNCDVVIGIVNNTVY        | 1135 |
| Alpha/B.1.1.7     | PAICHDGKAHFPREGV FVSN GTHWFVTQRNFYEPQIITTHNTFVSGNCDVVIGIVNNTVY        | 1135 |
| P.1/Gamma         | PAICHDGKAHFPREGV FVSN GTHWFVTQRNFYEPQIITTDNTFVSGNCDVVIGIVNNTVY        | 1138 |
| Beta/B.1.351      | PAICHDGKAHFPREGV FVSN GTHWFVTQRNFYEPQIITTDNTFVSGNCDVVIGIVNNTVY        | 1135 |
|                   | *****:*****                                                           |      |
| SARS-CoV-2        | <b>DPLQPELDSFKEELDKYFKNHTSPD VDLGDISGINASVVNIQKEIDRLNEVAKNLNESLI</b>  | 1198 |
| Delta/B.1.617.2   | DPLQPELDSFKEELDKYFKNHTSPD VDLGDISGINASVVNIQKEIDRLNEVAKNLNESLI         | 1198 |
| Omicron/B.1.1.529 | DPLQPELDSFKEELDKYFKNHTSPD VDLGDISGINASVVNIQKEIDRLNEVAKNLNESLI         | 1195 |
| Alpha/B.1.1.7     | DPLQPELDSFKEELDKYFKNHTSPD VDLGDISGINASVVNIQKEIDRLNEVAKNLNESLI         | 1195 |
| P.1/Gamma         | DPLQPELDSFKEELDKYFKNHTSPD VDLGDISGINASVVNIQKEIDRLNEVAKNLNESLI         | 1198 |
| Beta/B.1.351      | DPLQPELDSFKEELDKYFKNHTSPD VDLGDISGINASVVNIQKEIDRLNEVAKNLNESLI         | 1195 |
|                   | *****:*****                                                           |      |

|                   |                                                            |      |
|-------------------|------------------------------------------------------------|------|
| SARS-CoV-2        | DLQELGKYEQYIKWFWYIWLGFIAGLIAIVMTIMLCCMTSCCCLKGCCSCGSCCKFDE | 1258 |
| Delta/B.1.617.2   | DLQELGKYEQYIKWFWYIWLGFIAGLIAIVMTIMLCCMTSCCCLKGCCSCGSCCKFDE | 1258 |
| Omicron/B.1.1.529 | DLQELGKYEQYIKWFWYIWLGFIAGLIAIVMTIMLCCMTSCCCLKGCCSCGSCCKFDE | 1255 |
| Alpha/B.1.1.7     | DLQELGKYEQYIKWFWYIWLGFIAGLIAIVMTIMLCCMTSCCCLKGCCSCGSCCKFDE | 1255 |
| P.1/Gamma         | DLQELGKYEQYIKWFWYIWLGFIAGLIAIVMTIMLCCMTSCCCLKGCCSCGSCCKFDE | 1258 |
| Beta/B.1.351      | DLQELGKYEQYIKWFWYIWLGFIAGLIAIVMTIMLCCMTSCCCLKGCCSCGSCCKFDE | 1255 |
| *****             |                                                            |      |
| SARS-CoV-2        | DDSEPVLLKGVKLHYT                                           | 1273 |
| Delta/B.1.617.2   | DDSEPVLLKGVKLHYT                                           | 1273 |
| Omicron/B.1.1.529 | DDSEPVLLKGVKLHYT                                           | 1270 |
| Alpha/B.1.1.7     | DDSEPVLLKGVKLHYT                                           | 1270 |
| P.1/Gamma         | DDSEPVLLKGVKLHYT                                           | 1273 |
| Beta/B.1.351      | DDSEPVLLKGVKLHYT                                           | 1270 |
| *****             |                                                            |      |

**Figure S3. Multiple sequence alignment and construction of the phylogenetic tree of SARS-CoV-2 VOCs. A)** Phylogenetic tree of SARS-CoV-2 Spike protein VOCs. **B)** Multiple sequence alignment of the Spike protein VOCs. The domains are colored as: signal peptide (orange); N-terminal domain (green), RBD (red), SD1 (pink) and SD2 (purple), cleavage sites (S1/S2 and S2' are colored in black) the fusion peptide (brown), HR1 (cyan and blue), HR2 (dark green), a transmembrane domain (grey), and cytoplasm domain (not colored) [5,6]. The predominant residues D614G and N501Y are pointed using arrows. The residues of the Spike protein involved in hACE2 interaction are highlighted: E1 region in yellow (corresponds to residues 417, 455-456, 470-490) and E2 region in light blue (made up of residues 444-454 and 493-505) [55]. Multiple sequence alignment and the phylogenetic tree were performed using the ClustalW server [14].

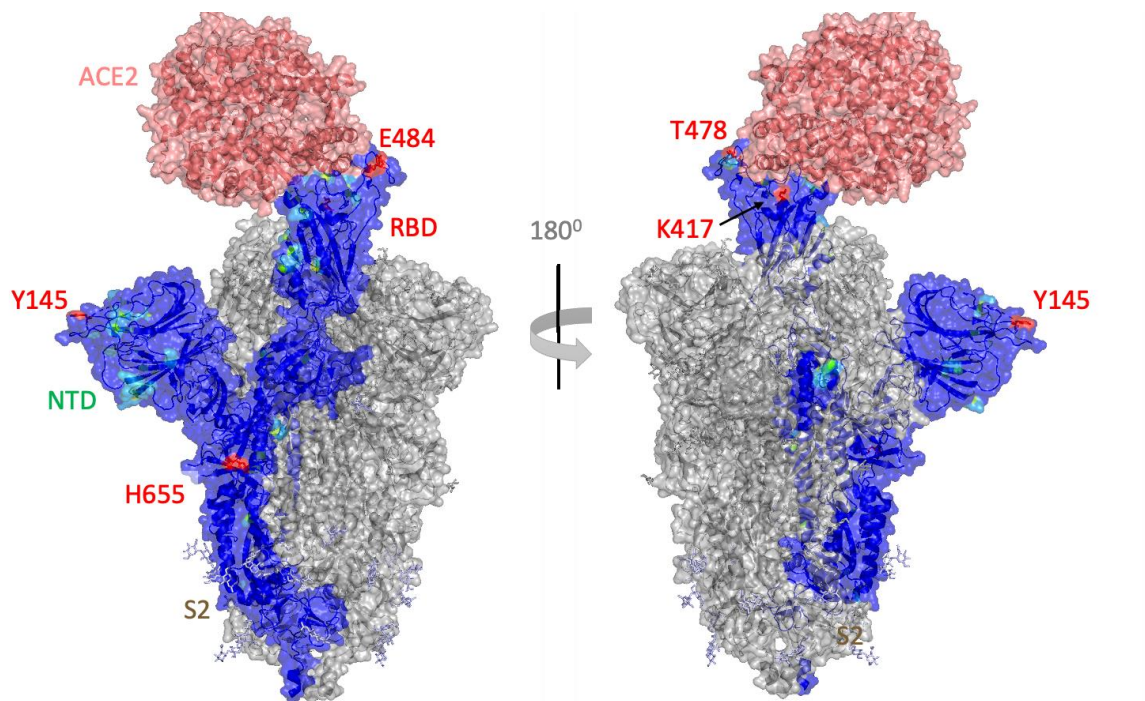

**Figure S4. Conservation profile of the Spike protein among VOCs.** The surface of the structure of the Spike<sup>WT</sup> protein in complex with ACE2 (PDB ID: 7DF4 [17]) is colored based on the conservation profile. The ACE2 structure is colored in salmon, and the chains A and C in the trimeric form of Spike protein are colored in grey. The residues Y145, K417, T478, E484 and H655 are colored in red and correspond to the residues in the SARS-CoV-2 VOCs with more variability.

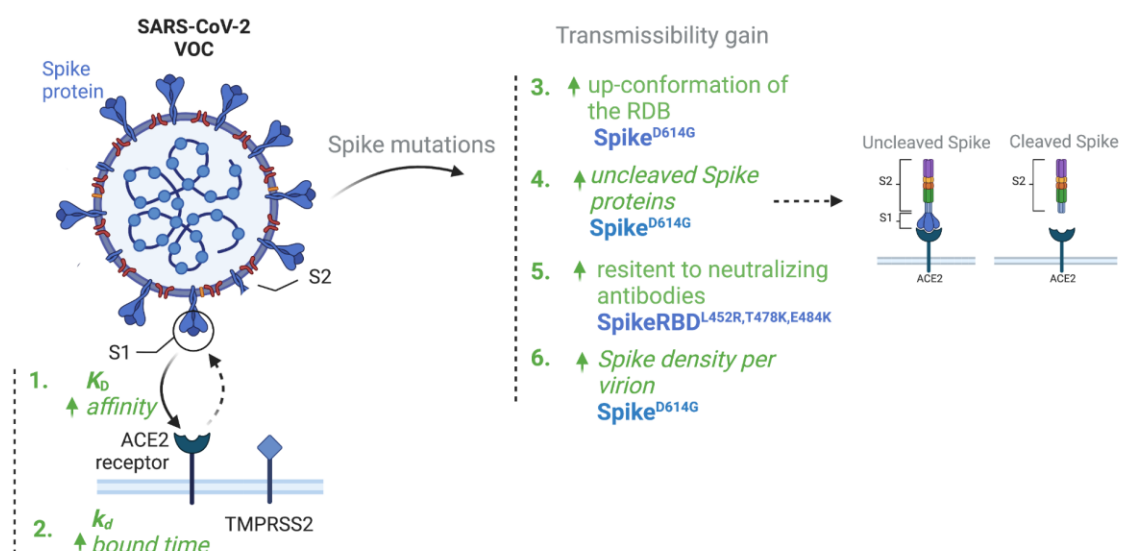

**Figure S5: Mutations in the Spike protein of SARS-CoV-2 VOCs result in different mechanisms to evade the immune system, increase the infectiveness, and spread the virus faster in the population.** Spike protein of SARS-CoV-2 VOCs increase the hACE2 affinity ( $K_D$ ) (1); increase the time that the Spike protein is bound to hACE2 ( $k_d$ ), favoring the process of membrane fusion (2); increase the up conformation of the RBD in the trimeric state of the Spike protein, a conformation that is able to bind to hACE2 (3); increase the amount of the uncleaved form of the Spike protein in virion particles (4); different mutations in the RBD improve resistance to neutralizing antibodies (5); and expand the concentration of Spike proteins per viral particles (6). All mechanisms described contribute to Spike's access to hACE2 and to membrane fusion. In the topic 4 spike cleaved protein refers to the spike protein that is naturally cleaved in the mature viral particle. Mutations in the Spike protein result in greater protection from the proteolysis of the spike protein resulting in an increased amount of complete Spike protein (uncleaved) on the virion surface.

**Table S1.** Conservation score in the Consurf Server analysis [15,16]. The Spike protein residues with the highest values are listed. High values meaning not conserved residues in the Spike protein among SARS-CoV-2 VOCs.

| Spike Residue | Conservation Score |
|---------------|--------------------|
| L18           | 4.5                |
| T19           | 4.0                |
| P26           | 4.4                |
| H69           | 4.1                |
| D80           | 4.2                |
| T95           | 4.0                |
| D138          | 4.2                |
| <b>Y145</b>   | <b>7.5</b>         |
| H146          | 4.3                |
| E156          | 4.3                |

|      |     |
|------|-----|
| R190 | 4.2 |
| N211 | 4.3 |
| L212 | 4.5 |
| V213 | 4.7 |
| R214 | 5.0 |
| D215 | 4.2 |
| G339 | 4.6 |
| S371 | 4.2 |
| G339 | 4.6 |
| S371 | 4.2 |
| S373 | 4.0 |
| S375 | 4.1 |
| K417 | 8.6 |
| N440 | 4.1 |
| G446 | 4.4 |
| L452 | 4.5 |
| S477 | 3.9 |
| T478 | 7.2 |
| E484 | 7.3 |
| Q493 | 4.3 |
| G496 | 4.4 |
| Q498 | 4.3 |
| N501 | 4.5 |
| Y505 | 4.4 |
| T547 | 4.2 |
| D614 | 4.5 |
| H655 | 7.2 |
| A701 | 4.0 |

|       |     |
|-------|-----|
| T716  | 4.0 |
| N764  | 4.1 |
| D796  | 4.4 |
| N856  | 4.1 |
| D950  | 4.1 |
| Q954  | 4.2 |
| N969  | 4.1 |
| L981  | 4.5 |
| S982  | 3.9 |
| T1027 | 4.0 |
| D1118 | 4.2 |
